# Supplementary material for: Kiwicha (Amaranthus caudatus L.) protein hydrolysates reduce intestinal inflammation by modulating the NLRP3 inflammasome pathway
Source: Royal Society of Chemistry journal article supplement (doi:10.1039/d2fo02177c), 2022-01-01
Supplement: d2fo02177c1.pdf [file d2fo02177c1.pdf]

**Supplementary Table 1.** Sequence and GenBank accession number of oligonucleotides used in RT-qPCR.

| <b>Target</b> | <b>GenBank accession number</b> | <b>Direction</b>   | <b>Sequence (5'→3')</b>                         |
|---------------|---------------------------------|--------------------|-------------------------------------------------|
| TNF- $\alpha$ | NM_001270782.1                  | Forward<br>Reverse | GTGGGAGCTTCTCACTCTGG<br>TAGGGCTTTTTCTCCTGCAA    |
| IL-1 $\beta$  | NM_000576                       | Forward<br>Reverse | AAGGAGAGCTCTTTCCCACC<br>GCCTCTGGTCTCCTTGGATT    |
| IL-6          | NM_000600                       | Forward<br>Reverse | TAACCATCCCTGTCCCAACC<br>AGTTACATGCCAGTGGACA     |
| IL-10         | NM_000572                       | Forward<br>Reverse | CTGACATCAAGGAGCACGTG<br>GGCTTTGTAGACACCCCTCT    |
| NLRP3         | NM_004895.5                     | Forward<br>Reverse | GTCTGGGTGAGAGTGTGAGC<br>TCATCGGGGTCAAACAGCAA    |
| ASC           | NM_013258.5                     | Forward<br>Reverse | TCTACCTGGAGACCTACGGC<br>ATAAAGTGCAGGCCTGGCTT    |
| CASP1         | NM_001257119.3                  | Forward<br>Reverse | CAAGACCTCTGACAGCACGT<br>GCAGGCCTGGATGATGATCA    |
| IL-18         | NM_001386420.1                  | Forward<br>Reverse | GATAATGCACCCCGGACCAT<br>CCTCCGGAGTGCAAGTGATT    |
| GAPDH         | NM_001289746.2                  | Forward<br>Reverse | CACATGGCCTCCAAGGAGTAAG<br>CCAGCAGTGAGGGGTCTCTCT |
